# Supplementary material for: Valorization of a Waste Product of Edible Flowers: Volatile Characterization of Leaves
Source: MDPI journal article supplement (doi:10.3390/molecules27072172), 2022-03-27
Supplement: s1 [file s1]

## Supplementary

**Table S1.** Volatile chemical composition of the leaves from the studied Lamiaceae species, analysed by headspace solid phase microextraction (HS-SPME) ( $n = 3 \pm \text{SD}$ ).

| Mentheae Tribe         |                                |       |                  |                         |                      |                      |                    |                     |                    |                    |                     |                       | Ocimeae Tribe          |                         |                          |
|------------------------|--------------------------------|-------|------------------|-------------------------|----------------------|----------------------|--------------------|---------------------|--------------------|--------------------|---------------------|-----------------------|------------------------|-------------------------|--------------------------|
| Subtribe Nepetinae     |                                |       |                  |                         |                      |                      |                    |                     | Subtribe Menthinae |                    | Subtribe Salviinae  |                       | Subtribe Ociminae      |                         |                          |
| Nº                     | Compounds <sup>1</sup>         | class | LRI <sup>2</sup> | <i>A. 'Arcado Pink'</i> | <i>A. aurantiaca</i> | <i>A. 'Blue Boa'</i> | <i>A. mexicana</i> | <i>N. x faaseni</i> | <i>M. didyma</i>   | <i>S. discolor</i> | <i>S. dorisiana</i> | <i>S. microphylla</i> | <i>O. b 'Cinnamon'</i> | <i>O. × citriodorum</i> | <i>O. b 'Blue Spice'</i> |
| Relative abundance (%) |                                |       |                  |                         |                      |                      |                    |                     |                    |                    |                     |                       |                        |                         |                          |
| 1                      | β-Myrcene                      | mh    | 991              | -                       | -                    | 0.1±0.03             | 2.6±0.13           | 0.1±0.01            | -                  | -                  | 0.5±0.02            | -                     | -                      | 0.3±0.13                | -                        |
| 2                      | Limonene                       | mh    | 1029             | 0.5±0.08                | 0.7±0.09             | 4.0±0.50             | 0.4±0.04           | 0.9±0.09            | 1.2±0.18           | -                  | 7.0±0.47            | -                     | -                      | -                       | -                        |
| 3                      | γ-Terpinene                    | mh    | 1029             | -                       | -                    | -                    | 0.1±0.06           | 0.3±0.09            | -                  | -                  | 0.1±0.01            | 4.6±0.10              | -                      | -                       | -                        |
| 4                      | Eucalyptol                     | om    | 1031             | -                       | -                    | -                    | -                  | 7.4±0.16            | -                  | -                  | -                   | 11.1±0.93             | 0.4±0.26               | -                       | -                        |
| 5                      | (Z)-β-Ocimene                  | mh    | 1037             | -                       | -                    | -                    | 0.4±0.03           | -                   | -                  | -                  | -                   | -                     | -                      | -                       | 2.2±0.19                 |
| 6                      | (E)-β-Ocimene                  | mh    | 1050             | -                       | -                    | -                    | 1.0±0.48           | -                   | -                  | -                  | -                   | -                     | 2.0±0.13               | -                       | 0.4±0.09                 |
| 7                      | Linalool                       | om    | 1097             | -                       | -                    | -                    | 1.5±0.46           | 0.1±0.01            | 4.5±1.37           | -                  | -                   | -                     | 2.9±0.48               | -                       | -                        |
| 8                      | Camphor                        | om    | 1146             | -                       | -                    | -                    | 0.1±0.09           | -                   | 0.2±0.02           | -                  | -                   | 8.4±0.20              | 0.4±0.03               | -                       | -                        |
| 9                      | isoMenthone                    | om    | 1164             | 2.9±0.94                | -                    | 4.7±0.11             | -                  | -                   | -                  | -                  | -                   | -                     | -                      | -                       | -                        |
| 10                     | Menthofurane                   | om    | 1164             | -                       | 1.0±0.26             | -                    | -                  | -                   | -                  | -                  | -                   | -                     | -                      | -                       | -                        |
| 11                     | 4-Terpineol                    | om    | 1177             | -                       | -                    | -                    | -                  | 0.2±0.06            | 0.2±0.04           | -                  | -                   | -                     | 1.5±0.32               | -                       | -                        |
| 12                     | isoPulegone                    | om    | 1177             | -                       | 1.8±0.15             | 0.6±0.07             | 0.1±0.01           | -                   | -                  | -                  | -                   | -                     | -                      | -                       | -                        |
| 13                     | Citronellol                    | om    | 1226             | -                       | -                    | -                    | 5.3±1.27           | -                   | -                  | -                  | -                   | -                     | -                      | -                       | -                        |
| 14                     | Nerol                          | om    | 1230             | -                       | -                    | -                    | -                  | -                   | -                  | -                  | -                   | -                     | -                      | 4.2±0.54                | -                        |
| 15                     | Thymol methyl ether            | om    | 1235             | -                       | -                    | -                    | -                  | -                   | 13.3±3.37          | -                  | -                   | -                     | -                      | -                       | -                        |
| 16                     | Pulegone                       | om    | 1237             | 3.1±0.38                | 52.8±4.37            | 51.9±2.27            | -                  | -                   | -                  | -                  | -                   | -                     | -                      | -                       | -                        |
| 17                     | Neral                          | om    | 1238             | -                       | -                    | -                    | 2.0±0.15           | -                   | -                  | -                  | -                   | -                     | -                      | 8.6±1.86                | -                        |
| 18                     | Chavicol                       | pp    | 1250             | -                       | -                    | -                    | -                  | -                   | -                  | -                  | -                   | -                     | -                      | -                       | 2.0±0.11                 |
| 19                     | Beraniol                       | om    | 1253             | -                       | -                    | -                    | 7.1±0.29           | -                   | -                  | -                  | -                   | -                     | -                      | -                       | -                        |
| 20                     | 3,7-dimethyl-2,6-octadien-1-ol | om    | 1253             | -                       | -                    | -                    | -                  | -                   | -                  | -                  | -                   | -                     | -                      | 3.3±0.91                | -                        |
| 21                     | Geranial                       | om    | 1267             | -                       | -                    | -                    | 5.3±0.80           | -                   | -                  | -                  | -                   | -                     | -                      | 23.7±3.61               | -                        |
| 22                     | isoBornyl acetate              | om    | 1286             | -                       | -                    | -                    | 1.4±0.39           | -                   | -                  | -                  | -                   | -                     | -                      | -                       | -                        |

|    |                                      |    |      |           |           |           |           |           |           |           |           |           |                  |           |                  |
|----|--------------------------------------|----|------|-----------|-----------|-----------|-----------|-----------|-----------|-----------|-----------|-----------|------------------|-----------|------------------|
| 23 | Bornyl acetate                       | om | 1289 | -         | -         | -         | -         | -         | 1.1±0.36  | -         | -         | 0.3±0.04  | -                | -         | -                |
| 24 | Thymol                               | om | 1290 | -         | -         | -         | -         | 0.1±0.02  | 37.2±1.76 | -         | -         | -         | -                | -         | -                |
| 25 | Myrtenyl acetate                     | om | 1327 | -         | -         | -         | -         | -         | -         | -         | 3.4±0.17  | -         | -                | -         | -                |
| 26 | Elemene isomer                       | sh | 1344 | 2.4±0.11  | -         | 2.6±0.92  | -         | -         | -         | -         | -         | -         | -                | -         | -                |
| 27 | Citronellyl acetate                  | om | 1353 | -         | -         | -         | 9.2±0.17  | -         | -         | -         | -         | -         | -                | -         | -                |
| 28 | Eugenol                              | pp | 1359 | -         | -         | -         | -         | -         | -         | -         | -         | -         | <b>28.8±2.77</b> | 2.1±0.28  | <b>35.6±5.67</b> |
| 29 | Nerol acetate                        | om | 1362 | -         | -         | -         | 4.2±0.05  | -         | -         | -         | -         | -         | -                | 0.5±0.04  | -                |
| 30 | $\alpha$ -Copaene                    | sh | 1377 | 0.4±0.08  | -         | -         | -         | -         | 0.5±0.06  | -         | -         | 12.0±0.45 | 0.3±0.04         | -         | -                |
| 31 | Geranyl acetate                      | om | 1381 | -         | -         | -         | 46.7±2,81 | -         | -         | -         | -         | -         | -                | -         | -                |
| 32 | $\beta$ -Bourbonene                  | sh | 1388 | 1.0±0.11  | -         | -         | -         | -         | 0.2±0.16  | 0.4±0.03  | -         | -         | -                | -         | -                |
| 33 | $\beta$ -Elemene                     | sh | 1391 | 3.5±0.12  | -         | -         | -         | 0.3±0.14  | 1.4±0.38  | 13.4±0.28 | -         | -         | 11.9±1.98        | 0.3±0.04  | -                |
| 34 | <i>cis-trans</i> -Nepetalactone      | om | 1392 | -         | -         | -         | -         | 37.1±2.76 | -         | -         | -         | -         | -                | -         | -                |
| 35 | Methyl perillate                     | om | 1394 | -         | -         | -         | -         | -         | -         | -         | 25.2±2.14 | -         | -                | -         | -                |
| 36 | Methyleugenol                        | pp | 1402 | -         | -         | -         | 2.9±0.26  | -         | -         | -         | -         | -         | -                | -         | -                |
| 37 | $\beta$ -Caryophyllene               | sh | 1419 | 21.6±0.49 | 35.4±5.29 | 19.0±1.03 | 7.5±0.77  | 34.8±3.33 | 9.8±0.78  | 53.9±3.73 | 23.9±2.75 | 27.6±0.22 | -                | 10.3±0.34 | -                |
| 38 | $\beta$ -Ylangene                    | sh | 1421 | -         | -         | -         | -         | -         | -         | -         | -         | -         | 1.3±0.29         | -         | -                |
| 39 | $\beta$ -Copaene                     | sh | 1432 | 2.9±0.08  | -         | -         | -         | -         | -         | -         | -         | -         | -                | -         | -                |
| 40 | <i>cis</i> - $\beta$ -Copaene        | sh | 1432 | -         | 0.1±0.03  | -         | -         | 0.3±0.04  | 1.3±0.20  | -         | 0.1±0.01  | 1.0±0.07  | 0.5±0.19         | -         | -                |
| 41 | <i>trans</i> - $\alpha$ -Bergamotene | sh | 1435 | -         | -         | -         | -         | -         | -         | -         | -         | -         | 0.8±0.13         | 5.2±0.46  | 1.4±0.69         |
| 42 | Perillyl acetate                     | om | 1436 | -         | -         | -         | -         | -         | -         | -         | 23.6±1.08 | -         | -                | -         | -                |
| 43 | $\alpha$ -Guaiene                    | sh | 1440 | -         | -         | -         | -         | -         | -         | -         | -         | 0.1±0.07  | 2.6±0.02         | -         | -                |
| 44 | Aromadendrene                        | sh | 1441 | -         | -         | -         | -         | -         | -         | -         | 1.2±0.19  | -         | -                | -         | -                |
| 45 | <i>iso</i> Germacrene D              | sh | 1448 | 1.1±0.37  | -         | -         | -         | -         | -         | -         | -         | -         | -                | -         | -                |
| 46 | <i>cis</i> -Muurolo-3,5-diene        | sh | 1450 | -         | -         | -         | -         | -         | -         | -         | -         | -         | 1.1±0.38         | -         | -                |
| 47 | $\alpha$ -Humulene                   | sh | 1454 | 4.7±0.52  | 4.5±0.25  | 0.9±0.13  | 1.0±0.03  | 1.6±0.40  | -         | 6.7±0.01  | 0.7±0.20  | 1.4±0.04  | 1.3±0.09         | 3.0±0.08  | 1.3±0.36         |
| 48 | ( <i>E</i> )- $\beta$ -Farnesene     | sh | 1457 | -         | 0.5±0.05  | -         | -         | 0.6±0.29  | -         | 0.6±0.19  | 0.2±0.03  | -         | 0.2±0.13         | -         | 1.0±0.35         |
| 49 | <i>cis</i> -Muurolo-4(15),5-diene    | sh | 1462 | 2.0±0.13  | -         | -         | -         | -         | 0.7±0.11  | -         | -         | -         | 2.0±0.35         | -         | -                |
| 50 | $\gamma$ -Muuroloene                 | sh | 1477 | 1.0±0.12  | -         | -         | -         | -         | -         | -         | -         | 3.1±0.02  | 0.2±0.12         | -         | -                |
| 51 | $\gamma$ -Selinene                   | sh | 1478 | -         | -         | -         | -         | -         | -         | 2.6±0.03  | -         | -         | -                | -         | -                |
| 52 | Germacrene D                         | sh | 1481 | 33.3±3.04 | 2.1±0.78  | 4.1±0.22  | -         | 6.0±0.37  | 23.0±3.28 | 2.1±0.11  | 0.4±0.12  | -         | 9.1±0.45         | 5.2±1.04  | 1.6±0.46         |

|    |                                                                              |    |      |          |          |          |   |          |          |          |          |          |           |           |           |   |
|----|------------------------------------------------------------------------------|----|------|----------|----------|----------|---|----------|----------|----------|----------|----------|-----------|-----------|-----------|---|
| 53 | $\beta$ -Eudesmene                                                           | sh | 1486 | -        | -        | -        | - | -        | -        | 4.9±0.25 | -        | -        | -         | -         | -         | - |
| 54 | $\beta$ -Selinene                                                            | sh | 1490 | -        | -        | -        | - | -        | -        | -        | -        | 2.4±0.02 | 0.4±0.11  | -         | -         | - |
| 55 | ledene                                                                       | sh | 1493 | -        | -        | -        | - | -        | -        | -        | 1.5±0.03 | -        | -         | -         | -         | - |
| 56 | Valencene                                                                    | sh | 1496 | -        | -        | -        | - | -        | -        | -        | -        | 1.6±0.04 | -         | -         | -         | - |
| 57 | bicyclogermacrene                                                            | sh | 1500 | 7.2±0.71 | -        | 7.8±0.75 | - | -        | -        | -        | -        | -        | -         | -         | -         | - |
| 58 | $\beta$ -Bisabolene                                                          | sh | 1506 | -        | -        | -        | - | 0.3±0.13 | -        | 3.8±0.76 | -        | -        | 0.2±0.06  | 0.3±0.09  | 25.9±2.22 | - |
| 59 | ( <i>E,E</i> )- $\alpha$ -Farnesene                                          | sh | 1508 | 1.9±0.06 | -        | 1.6±0.08 | - | -        | -        | -        | -        | -        | -         | -         | -         | - |
| 60 | $\alpha$ -Cuprene                                                            | sh | 1509 | -        | -        | -        | - | -        | -        | 1.3±0.08 | -        | -        | -         | -         | -         | - |
| 61 | $\alpha$ -Bulnesene                                                          | sh | 1510 | -        | -        | -        | - | -        | -        | -        | -        | -        | 7.6±0.25  | -         | -         | - |
| 62 | $\gamma$ -Cadinene                                                           | sh | 1513 | 3.1±0.65 | -        | -        | - | 0.5±0.09 | -        | 0.9±0.25 | 0.8±0.03 | 1.5±0.02 | 13.0±1.11 | -         | -         | - |
| 63 | 1-ethyl-3-vinyl-adamantane                                                   | nt | 1514 | -        | -        | 0.4±0.17 | - | -        | 1.0±0.54 | -        | -        | -        | -         | -         | -         | - |
| 64 | $\delta$ -Cadinene                                                           | sh | 1523 | 3.6±0.91 | 0.1±0.06 | 0.3±0.14 | - | 0.4±0.11 | 1.7±0.65 | -        | 2.3±0.12 | 7.7±0.06 | 0.9±0.16  | 0.4±0.14  | -         | - |
| 65 | ( <i>E</i> )- $\gamma$ -Bisabolene                                           | sh | 1531 | -        | -        | -        | - | 0.1±0.09 | -        | -        | -        | -        | -         | 29.9±0.95 | -         | - |
| 66 | Naphthalene, decahydro-4a-methyl-1-methylene-7-(1-methylethylidene)-, trans- | sh | 1544 | -        | -        | -        | - | -        | -        | 1.2±0.18 | -        | -        | -         | -         | -         | - |
| 67 | Germacrene B                                                                 | sh | 1561 | -        | -        | -        | - | -        | -        | -        | -        | -        | -         | -         | 24.9±1.90 | - |
| 68 | Guaiol                                                                       | os | 1601 | -        | -        | -        | - | -        | -        | -        | -        | 5.7±0.70 | -         | -         | -         | - |
| 69 | <i>epi</i> Cubenol                                                           | os | 1627 | -        | -        | -        | - | -        | -        | -        | -        | -        | 1.0±0.14  | -         | -         | - |
| 70 | $\gamma$ -Eudesmol                                                           | os | 1632 | -        | -        | -        | - | -        | -        | -        | -        | 1.1±0.17 | -         | -         | -         | - |
| 71 | T-Cadinol                                                                    | os | 1640 | -        | -        | -        | - | 0.1±0.03 | -        | -        | -        | -        | 7.3±0.28  | 0.8±0.08  | -         | - |
| 72 | $\beta$ -Eudesmol                                                            | os | 1651 | -        | -        | -        | - | -        | -        | -        | -        | 1.3±0.18 | -         | -         | -         | - |
| 73 | $\alpha$ -Eudesmol                                                           | os | 1654 | -        | -        | -        | - | -        | -        | -        | -        | 2.6±0.30 | -         | -         | -         | - |
| 74 | Elemyl acetate                                                               | sh | 1679 | -        | -        | -        | - | -        | -        | 5.1±0.75 | -        | -        | -         | -         | -         | - |
| 75 | Pentylcurcumene                                                              | dh | 1930 | -        | -        | -        | - | 4.2±1.49 | -        | -        | 1.6±0.75 | -        | -         | -         | -         | - |
| 76 | 9-Geranyl- <i>p</i> -cymene                                                  | od | 1980 | -        | -        | -        | - | -        | -        | -        | 1.3±0.39 | -        | -         | -         | -         | - |

| Menthaeae Tribe               |                         |                      |                      |                    |                      |                  |                    |                     |                       | Ocimeae Tribe          |                         |                          |
|-------------------------------|-------------------------|----------------------|----------------------|--------------------|----------------------|------------------|--------------------|---------------------|-----------------------|------------------------|-------------------------|--------------------------|
| Subtribe Nepetinae            |                         |                      |                      |                    |                      |                  |                    |                     |                       | Subtribe Ociminae      |                         |                          |
|                               |                         |                      |                      |                    |                      |                  |                    |                     |                       |                        |                         |                          |
| Chemical classes              | <i>A. 'Arcado Pink'</i> | <i>A. aurantiaca</i> | <i>A. 'Blue Boa'</i> | <i>A. mexicana</i> | <i>N. x faasanii</i> | <i>M. didyma</i> | <i>S. discolor</i> | <i>S. dorisiana</i> | <i>S. microphylla</i> | <i>O. b 'Cinnamon'</i> | <i>O. × citriodorum</i> | <i>O. b 'Blue Spice'</i> |
| Monoterpene Hydrocarbons (mh) | 0.5±0.08                |                      | 4.7±0.19             | 4.8±0.68           | 2.2±0.23             | 1.2±0.18         | 0.5±0.24           | 7.9±0.49            | 5.1±0.16              | 2.0±0.13               | 0.3±0.13                | 2.6±0.28                 |

|                                 |           |           |           |           |           |           |           |           |           |           |           |           |
|---------------------------------|-----------|-----------|-----------|-----------|-----------|-----------|-----------|-----------|-----------|-----------|-----------|-----------|
| Oxygenated Monoterpenes (om)    | 6.3±0.68  | 56.5±4.47 | 57.9±2.77 | 83.1±1.92 | 45.0±3.36 | 56.5±5.86 | -         | 53.8±4.07 | 19.8±0.78 | 5.2±0.30  | 40.3±3.57 | -         |
| Sesquiterpene Hydrocarbons (sh) | 92.2±4.41 | 42.8±5.75 | 36.3±1.03 | 8.5±0.76  | 46.0±5.74 | 39.9±4.18 | 97.8±1.40 | 32.5±2.33 | 60.8±0.59 | 55.3±3.96 | 54.7±0.14 | 56.6±5.01 |
| Oxygenated Sesquiterpenes (os)  | 0.8±0.17  | -         | -         | 0.1±0.07  | 0.6±0.34  | -         | -         | 0.2±0.16  | 11.6±1.41 | 8.4±0.47  | 0.9±0.10  | -         |
| Diterpene Hydrocarbons (dh)     | -         | -         | -         | -         | 4.2±1.49  | -         | -         | 1.6±0.75  | -         | -         | -         | -         |
| Oxygenated Diterpenes (od)      | -         | -         | -         | -         | -         | -         | -         | 1.3±0.39  | -         | -         | -         | -         |
| Phenylpropanoids (pp)           | -         | -         | -         | 2.9±0.26  | 0.7±0.06  | -         | -         | -         | -         | 28.8±2.77 | 2.1±0.28  | 38.1±6.22 |
| Non-Terpene derivatives (nt)    | -         | -         | 0.6±0.04  | -         | 0.1±0.09  | 1.1±0.46  | 0.4±0.08  | 0.9±0.25  | -         | 0.2±0.09  | -         | -         |
| Total Identified                | 99.8±0.12 | 99.3±0.09 | 99.5±0.36 | 99.4±0.31 | 98.8±0.55 | 98.7±0.08 | 98.7±0.36 | 98.2±0.50 | 97.3±0.20 | 99.9±0.01 | 98.3±0.95 | 97.3±0.60 |

<sup>1</sup>compounds present in tables with value > 1% in at least one of studied species; <sup>2</sup>LRI: relative retention index determined on HP-5MS capillary column.

**Table S2.** Chemical composition of the EOs obtained from the leaves of the studied plant species ( $n = 3 \pm \text{SD}$ ).

| Menthae Tribe |                          |       |                  |                         |                      |                     |                    |                      |                    |                    |                     |                       |                        |                         |                           | Ocimeae Tribe |  |  |
|---------------|--------------------------|-------|------------------|-------------------------|----------------------|---------------------|--------------------|----------------------|--------------------|--------------------|---------------------|-----------------------|------------------------|-------------------------|---------------------------|---------------|--|--|
|               |                          |       |                  | Subtribe Nepetinae      |                      |                     |                    |                      | Subtribe Menthinae | Subtribe Salviinae |                     |                       |                        | Subtribe Ociminae       |                           |               |  |  |
|               |                          |       |                  | <i>A. 'Arcado Pink'</i> | <i>A. aurantiaca</i> | <i>A. 'BleuBoa'</i> | <i>A. mexicana</i> | <i>N. x faasanii</i> | <i>M. didyma</i>   | <i>S. discolor</i> | <i>S. dorisiana</i> | <i>S. microphylla</i> | <i>O. b 'Cinnamon'</i> | <i>O. × citriodorum</i> | <i>O. b. 'Blue Spice'</i> |               |  |  |
| Nº            | Compounds <sup>1</sup>   | Class | LRI <sup>2</sup> | Relative abundance (%)  |                      |                     |                    |                      |                    |                    |                     |                       |                        |                         |                           |               |  |  |
| 1             | α-Pinene                 | mh    | 939              | -                       | -                    | -                   | -                  | 0.2±0.02             | -                  | -                  | -                   | 0.4±0.06              | -                      | -                       | -                         |               |  |  |
| 2             | Camphene                 | mh    | 954              | -                       | -                    | -                   | 0.3±0.04           | -                    | -                  | -                  | -                   | 0.5±0.06              | -                      | -                       | -                         |               |  |  |
| 3             | Sabinene                 | mh    | 975              | -                       | -                    | 0.1±0.01            | -                  | 0.3±0.03             | -                  | 0.6±0.18           | -                   | -                     | -                      | -                       | -                         |               |  |  |
| 4             | β-Pinene                 | mh    | 979              | -                       | -                    | -                   | -                  | 0.7±0.05             | -                  | -                  | -                   | -                     | -                      | -                       | -                         |               |  |  |
| 5             | 1-Octen-3-ol             | nt    | 980              | -                       | 0.3±0.04             | 1.2±0.02            | 0.5±0.04           | -                    | 1.6±0.22           | -                  | -                   | -                     | -                      | -                       | -                         |               |  |  |
| 6             | 3-Octanone               | nt    | 984              | -                       | -                    | 0.2±0.02            | -                  | -                    | -                  | -                  | -                   | -                     | -                      | -                       | -                         |               |  |  |
| 7             | 6-Methyl-5-heptene-2-one | nt    | 986              | -                       | -                    | -                   | 0.4±0.03           | -                    | -                  | -                  | -                   | -                     | -                      | -                       | -                         |               |  |  |
| 8             | β-Myrcene                | mh    | 991              | -                       | 0.2±0.05             | 0.5±0.03            | 1.1±0.15           | 0.2±0.01             | -                  | -                  | 0.1±0.00            | -                     | -                      | -                       | -                         |               |  |  |
| 9             | 3-Octanol                | nt    | 994              | -                       | -                    | -                   | -                  | -                    | 0.5±0.07           | -                  | -                   | -                     | -                      | -                       | -                         |               |  |  |
| 10            | o-Cymene                 | mh    | 1026             | -                       | -                    | -                   | -                  | -                    | 0.2±0.04           | -                  | -                   | 0.2±0.15              | -                      | -                       | -                         |               |  |  |
| 11            | Limonene                 | mh    | 1030             | 0.5±0.11                | 0.5±0.08             | 8.2±0.38            | 0.4±0.04           | -                    | -                  | -                  | 1.0±0.54            | 0.2±0.16              | -                      | -                       | -                         |               |  |  |
| 12            | Eucalyptol               | om    | 1031             | -                       | -                    | -                   | -                  | 10.0±0.68            | 0.5±0.05           | -                  | 0.2±0.15            | 1.4±0.14              | 0.1±0.01               | -                       | 1.4±0.43                  |               |  |  |
| 13            | (E)- β-Ocimene           | mh    | 1050             | -                       | -                    | -                   | 0.2±0.03           | 0.5±0.02             | -                  | -                  | -                   | -                     | 1.3±0.48               | -                       | 0.5±0.22                  |               |  |  |

|    |                                |    |      |          |          |           |          |          |           |          |          |          |          |          |          |
|----|--------------------------------|----|------|----------|----------|-----------|----------|----------|-----------|----------|----------|----------|----------|----------|----------|
| 14 | $\gamma$ -Terpinene            | mh | 1060 | -        | -        | -         | -        | -        | 0.1±0.07  | -        | 0.1±0.07 | 0.6±0.05 | 0.2±0.18 | -        | -        |
| 15 | cis-Sabinene hydrate           | om | 1070 | -        | -        | -         | -        | 0.2±0.03 | 0.3±0.01  | -        | -        | -        | 0.5±0.16 | -        | 0.1±0.08 |
| 16 | cis-linalool oxide (furanoid)  | om | 1087 | -        | -        | -         | -        | -        | 0.1±0.03  | -        | -        | -        | -        | -        | -        |
| 17 | Terpinolene                    | mh | 1089 | -        | -        | -         | -        | -        | -         | -        | 0.1±0.01 | -        | 0.1±0.03 | -        | -        |
| 18 | p-Cymenene                     | mh | 1091 | -        | -        | 0.1±0.03  | -        | -        | -         | -        | -        | -        | -        | -        | -        |
| 19 | Linalool                       | om | 1099 | -        | -        | -         | 3.0±0.06 | 0.2±0.02 | 39.9±1.38 | 0.8±0.21 | -        | -        | 6.2±1.88 | 2.0±0.03 | -        |
| 20 | 2-Methylbutyl 2-methylbutyrate | nt | 1105 | -        | -        | -         | -        | -        | -         | -        | 0.1±0.08 | -        | -        | -        | -        |
| 21 | 1-Octen-3-yl-acetate           | nt | 1113 | -        | -        | 0.5±0.03  | -        | -        | -         | -        | -        | -        | -        | -        | -        |
| 22 | trans-p-Mentha-2,8-diene-1-ol  | om | 1123 | -        | -        | 0.2±0.03  | -        | -        | -         | -        | -        | -        | -        | -        | -        |
| 23 | 3-Octanol, acetate             | nt | 1124 | -        | -        | -         | -        | -        | -         | 1.2±0.29 | -        | -        | -        | -        | -        |
| 24 | Camphor                        | om | 1145 | -        | -        | -         | 0.3±0.02 | -        | -         | -        | -        | 4.2±0.10 | 0.6±0.18 | -        | -        |
| 25 | trans-Verbenol                 | om | 1146 | -        | -        | 0.1±0.09  | -        | -        | -         | -        | -        | -        | -        | -        | -        |
| 26 | trans-Chrysanthemal            | nt | 1153 | -        | -        | -         | 0.5±0.01 | -        | -         | -        | -        | -        | -        | -        | -        |
| 27 | Citronellal                    | om | 1154 | -        | -        | -         | 1.8±0.02 | -        | -         | -        | -        | -        | -        | -        | -        |
| 28 | p-Menthone                     | om | 1155 | 0.2±0.09 | 7.8±0.32 | 6.9±0.29  | -        | -        | -         | -        | -        | -        | -        | -        | -        |
| 29 | isoMenthone                    | om | 1163 | 1.9±0.39 | 3.0±0.11 | 31.6±0.15 | -        | -        | -         | -        | -        | -        | -        | -        | -        |
| 30 | endo-Borneol                   | om | 1167 | -        | -        | -         | 0.8±0.03 | -        | 0.1±0.01  | -        | -        | -        | -        | -        | -        |
| 31 | isoPulegone                    | om | 1175 | -        | -        | 0.8±0.05  | 1.3±0.16 | -        | -         | -        | -        | -        | -        | -        | -        |
| 32 | Terpinen-4-ol                  | om | 1177 | -        | -        | -         | -        | -        | 0.1±0.01  | -        | -        | -        | 3.1±0.86 | -        | -        |
| 33 | isoGeranial                    | om | 1185 | -        | -        | -         | 0.3±0.01 | -        | -         | -        | -        | -        | -        | -        | -        |
| 34 | $\alpha$ -Terpineol            | om | 1189 | -        | -        | -         | 0.1±0.02 | 0.3±0.02 | 1.3±0.07  | -        | 0.1±0.09 | -        | 0.2±0.00 | 0.7±0.03 | 0.3±0.10 |
| 35 | Myrtenol                       | om | 1195 | -        | -        | -         | -        | -        | -         | -        | 0.1±0.07 | -        | -        | -        | -        |
| 36 | Estragole                      | pp | 1196 | -        | -        | -         | -        | -        | -         | -        | -        | -        | -        | -        | 7.8±1.72 |
| 37 | Verbenone                      | om | 1205 | -        | 0.5±0.02 | -         | -        | -        | -         | -        | -        | -        | -        | -        | -        |
| 38 | n-Octyl acetate                | nt | 1214 | -        | -        | -         | -        | -        | -         | -        | -        | -        | 0.2±0.17 | -        | -        |
| 39 | $\beta$ -Cyclocitral           | ac | 1220 | -        | -        | -         | -        | -        | -         | -        | 0.1±0.08 | -        | -        | -        | -        |

|    |                                |    |      |   |           |           |           |          |           |   |          |          |           |   |           |   |   |
|----|--------------------------------|----|------|---|-----------|-----------|-----------|----------|-----------|---|----------|----------|-----------|---|-----------|---|---|
| 40 | 8,9-Dehydrothymol              | om | 1221 | - | 0.3±0.04  | -         | -         | -        | -         | - | -        | -        | -         | - | -         | - | - |
| 41 | Citronellol                    | om | 1226 | - | -         | -         | 11.9±0.79 | -        | -         | - | -        | -        | -         | - | -         | - | - |
| 42 | Thymol methyl ether            | om | 1235 | - | -         | -         | -         | -        | 17.7±0.20 | - | -        | -        | -         | - | -         | - | - |
| 43 | Pulegone                       | om | 1237 | - | 77.9±0.88 | 33.8±0.13 | -         | -        | 0.1±0.06  | - | -        | -        | -         | - | -         | - | - |
| 44 | Neral                          | om | 1240 | - | -         | -         | -         | -        | -         | - | -        | -        | -         | - | 38.3±0.89 | - | - |
| 45 | β-Citral                       | om | 1240 | - | -         | -         | 12.0±1.06 | -        | -         | - | -        | -        | -         | - | -         | - | - |
| 46 | Carvacrol methyl ether         | om | 1245 | - | -         | -         | -         | -        | 0.2±0.03  | - | -        | -        | -         | - | -         | - | - |
| 47 | Piperitone                     | om | 1253 | - | 0.3±0.03  | 0.6±0.04  | -         | -        | -         | - | -        | -        | -         | - | -         | - | - |
| 48 | Geraniol                       | om | 1255 | - | -         | -         | 10.6±0.54 | -        | -         | - | -        | -        | -         | - | -         | - | - |
| 49 | Geranial                       | om | 1270 | - | -         | -         | -         | -        | -         | - | -        | -        | -         | - | 44.2±1.87 | - | - |
| 50 | Perilla aldehyde               | om | 1272 | - | -         | -         | -         | -        | -         | - | 0.2±0.04 | -        | -         | - | -         | - | - |
| 51 | Citral                         | ac | 1276 | - | -         | -         | 16.6±0.49 | -        | -         | - | -        | -        | -         | - | -         | - | - |
| 52 | Methyl dihydrocinnamate        | nt | 1279 | - | -         | -         | -         | 0.7±0.04 | -         | - | -        | -        | -         | - | -         | - | - |
| 53 | Bornyl acetate                 | om | 1285 | - | -         | -         | 0.7±0.03  | -        | 0.6±0.41  | - | -        | 0.4±0.02 | 1.5±0.34  | - | -         | - | - |
| 54 | <i>cis,cis</i> -Nepetalactone  | om | 1289 | - | -         | -         | -         | 9,1±0.21 | -         | - | -        | -        | -         | - | -         | - | - |
| 55 | Thymol                         | om | 1290 | - | -         | -         | -         | -        | 24.7±1.14 | - | -        | -        | -         | - | -         | - | - |
| 56 | <i>trans</i> -Sabinyl acetate  | om | 1291 | - | -         | 0.2±0.03  | -         | -        | -         | - | -        | -        | -         | - | -         | - | - |
| 57 | <i>p</i> -Mentha-1,8-dien-7-ol | om | 1297 | - | -         | -         | -         | -        | -         | - | 0.5±0.05 | -        | -         | - | -         | - | - |
| 58 | Carvacrol                      | om | 1299 | - | -         | -         | -         | -        | 2.8±0.22  | - | -        | -        | -         | - | -         | - | - |
| 59 | Myrtenyl acetate               | om | 1327 | - | -         | -         | -         | -        | -         | - | 1.4±0.42 | -        | 0.01±0.01 | - | -         | - | - |
| 60 | (-)-Dihydrocarvyl acetate      | om | 1330 | - | -         | -         | 0.3±0.03  | -        | -         | - | -        | -        | -         | - | -         | - | - |
| 61 | <i>trans</i> -Carvyl acetate   | om | 1342 | - | -         | 0.2±0.02  | -         | -        | -         | - | -        | -        | -         | - | -         | - | - |
| 62 | Piperitenone                   | om | 1343 | - | 1.0±0.07  | 0.7±0.06  | -         | -        | -         | - | -        | -        | -         | - | -         | - | - |
| 63 | Ethyl dihydrocinnamate         | nt | 1353 | - | -         | -         | -         | 0.2±0.03 | -         | - | -        | -        | -         | - | -         | - | - |
| 64 | Citronellyl acetate            | om | 1354 | - | -         | -         | 6.1±0.09  | -        | -         | - | -        | -        | -         | - | -         | - | - |
| 65 | Eugenol                        | pp | 1359 | - | -         | -         | -         | -        | -         | - | -        | -        | 9.5±0.99  | - | 29.9±1.70 | - | - |

|    |                                        |    |      |           |          |          |           |           |          |           |           |          |           |          |          |   |
|----|----------------------------------------|----|------|-----------|----------|----------|-----------|-----------|----------|-----------|-----------|----------|-----------|----------|----------|---|
| 66 | Neryl acetate                          | om | 1362 | -         | -        | -        | 3.1±0.10  | -         | -        | -         | -         | -        | -         | -        | -        | - |
| 67 | $\alpha$ -Copaene                      | sh | 1377 | -         | -        | -        | -         | -         | -        | 0.5±0.05  | 0.1±0.04  | 1.9±0.04 | 0.2±0.17  | -        | -        | - |
| 68 | Geranyl acetate                        | om | 1382 | -         | -        | -        | 24.8±0.08 | -         | -        | -         | 0.3±0.04  | -        | -         | -        | -        | - |
| 69 | $\beta$ -Bourbonene                    | sh | 1388 | 0.4±0.02  | -        | -        | -         | 0.2±0.02  | -        | -         | -         | -        | -         | -        | -        | - |
| 70 | $\beta$ -Cubebene                      | sh | 1389 | -         | -        | -        | -         | -         | -        | -         | -         | -        | 0.2±0.18  | -        | -        | - |
| 71 | $\beta$ -Elemene                       | sh | 1391 | -         | -        | -        | -         | -         | -        | -         | -         | -        | 2.3±0.25  | -        | -        | - |
| 72 | <i>cis</i> -Jasmone                    | nt | 1393 | -         | -        | 0.1±0.02 | -         | -         | -        | -         | -         | -        | -         | -        | -        | - |
| 73 | Methyl perillate                       | om | 1394 | -         | -        | -        | -         | -         | -        | -         | 17.4±1.42 | -        | -         | -        | -        | - |
| 74 | Methyleugenol                          | om | 1402 | -         | -        | -        | 0.5±0.04  | -         | -        | -         | -         | -        | 0.5±0.06  | -        | -        | - |
| 75 | $\beta$ -Caryophyllene                 | sh | 1419 | 7.6±0.43  | 5.5±0.29 | 1.8±0.07 | 1.3±0.07  | 12.4±0.05 | 0.5±0.05 | 30.9±0.81 | 11.2±0.97 | 5.7±0.07 | 0.5±0.04  | 1.3±0.22 | 2.7±0.13 | - |
| 76 | $\alpha$ -Bergamotene                  | sh | 1435 | -         | -        | -        | -         | -         | -        | -         | -         | -        | 1.1±0.06  | -        | 1.5±0.07 | - |
| 77 | <i>p</i> -Mentha-1,8-dien-7-yl acetate | om | 1436 | -         | -        | -        | -         | -         | -        | -         | 25.3±1.54 | -        | -         | -        | -        | - |
| 78 | $\alpha$ -Guaiane                      | sh | 1440 | -         | -        | -        | -         | -         | -        | -         | -         | -        | 2.0±0.07  | -        | -        | - |
| 79 | $\alpha$ -Humulene                     | sh | 1455 | 2.1±0.02  | 1.0±0.08 | -        | 0.1±0.04  | 0.9±0.04  | -        | 4.9±0.09  | 0.6±0.05  | 0.7±0.04 | 1.7±0.04  | -        | 5.1±0.03 | - |
| 80 | ( <i>E</i> )- $\beta$ -Farnesene       | sh | 1457 | -         | 1.1±0.09 | -        | -         | 2.8±0.10  | -        | 0.3±0.02  | -         | -        | 0.9±0.05  | -        | 0.8±0.05 | - |
| 81 | <i>cis</i> -Muurolo-4(15),5-diene      | sh | 1467 | -         | -        | -        | -         | -         | -        | -         | -         | -        | 1.5±0.02  | -        | -        | - |
| 82 | $\beta$ -Cadinene                      | sh | 1472 | -         | -        | 0.2±0.03 | -         | -         | -        | -         | -         | -        | -         | -        | -        | - |
| 83 | $\gamma$ -Muurolene                    | sh | 1477 | -         | -        | -        | -         | -         | -        | -         | -         | 0.8±0.04 | -         | -        | -        | - |
| 84 | $\gamma$ -Curcumene                    | sh | 1480 | -         | -        | -        | -         | -         | -        | -         | 0.1±0.01  | -        | -         | -        | -        | - |
| 85 | Germacrene D                           | sh | 1485 | 33.9±0.95 | 2.0±0.14 | 2.5±0.06 | -         | 8.8±0.08  | 4.6±0.41 | 19.0±0.03 | -         | -        | 14.6±0.69 | -        | 4.7±0.06 | - |
| 86 | phenylethyl 2-methylbutyrate           | nt | 1488 | -         | -        | -        | -         | -         | -        | -         | 0.1±0.02  | -        | -         | -        | -        | - |
| 87 | bicycloSesquiphellandrene              | sh | 1489 | -         | -        | -        | -         | -         | -        | -         | -         | -        | -         | 0.7±0.07 | -        | - |
| 88 | Ledene                                 | sh | 1493 | -         | -        | -        | -         | -         | -        | -         | 0.5±0.02  | -        | -         | -        | -        | - |
| 89 | $\alpha$ -Zingiberene                  | sh | 1494 | -         | -        | -        | -         | 1.8±0.05  | -        | -         | -         | -        | -         | -        | -        | - |
| 90 | Aciphyllene                            | sh | 1499 | -         | -        | -        | -         | -         | -        | -         | -         | -        | 0.5±0.03  | -        | -        | - |
| 91 | bicycloGermacrene                      | sh | 1500 | 9.3±0.19  | -        | 4.4±0.03 | -         | -         | -        | 2.6±0.07  | -         | -        | 0.6±0.02  | -        | -        | - |

|     |                                     |    |      |           |          |          |   |          |          |          |          |           |          |           |          |           |
|-----|-------------------------------------|----|------|-----------|----------|----------|---|----------|----------|----------|----------|-----------|----------|-----------|----------|-----------|
| 92  | $\alpha$ -Muurolene                 | sh | 1500 | -         | -        | -        | - | -        | -        | -        | -        | -         | 0.2±0.15 | -         | -        | -         |
| 93  | <i>iso</i> Daucene                  | sh | 1503 | -         | -        | -        | - | 0.4±0.02 | -        | -        | -        | -         | -        | -         | -        | 0.2±0.03  |
| 94  | ( <i>E,E</i> )- $\alpha$ -Farnesene | sh | 1506 | 0.9±0.09  | -        | -        | - | -        | -        | -        | -        | -         | -        | -         | -        | -         |
| 95  | $\beta$ -Bisabolene                 | sh | 1507 | -         | -        | -        | - | 1.0±0.04 | -        | 3.5±0.02 | 0.1±0.01 | -         | -        | -         | -        | 18.7±1.24 |
| 96  | $\alpha$ -Farnesene                 | sh | 1508 | -         | -        | 0.2±0.03 | - | -        | 0.1±0.02 | -        | -        | -         | -        | -         | -        | -         |
| 97  | $\alpha$ -Bulnesene                 | sh | 1510 | 1.5±0.00  | -        | -        | - | -        | -        | 1.4±0.00 | -        | -         | -        | 10.0±0.44 | -        | -         |
| 98  | <i>trans</i> - $\alpha$ -Bisabolene | sh | 1512 | -         | -        | -        | - | -        | -        | -        | -        | -         | -        | -         | 1.3±0.14 | -         |
| 99  | $\gamma$ -Cadinene                  | sh | 1514 | 0.2±0.08  | -        | -        | - | 0.2±0.03 | -        | 0.5±0.02 | 0.7±0.02 | 1.1±0.04  | -        | 7.1±0.45  | -        | -         |
| 100 | $\beta$ -Sesquiphellandrene         | sh | 1523 | -         | -        | -        | - | 0.9±0.04 | -        | 0.9±0.01 | -        | -         | -        | -         | -        | 0.2±0.01  |
| 101 | $\delta$ -Cadinene                  | sh | 1524 | 2.3±0.12  | -        | -        | - | -        | -        | -        | 1.1±0.03 | 2.8±0.07  | -        | 0.3±0.03  | -        | -         |
| 102 | <i>trans</i> - $\gamma$ -Bisabolene | sh | 1531 | -         | -        | -        | - | 0.2±0.03 | -        | -        | -        | -         | -        | -         | -        | -         |
| 103 | $\alpha$ -Cadinene                  | sh | 1538 | -         | -        | -        | - | -        | -        | -        | -        | -         | -        | 0.1±0.01  | -        | -         |
| 104 | Elemol                              | os | 1550 | -         | -        | -        | - | -        | -        | 0.6±0.06 | -        | -         | -        | -         | -        | -         |
| 105 | myrtenyl 2-methyl butyrate          | nt | 1560 | -         | -        | -        | - | -        | -        | -        | 0.3±0.01 | -         | -        | -         | -        | -         |
| 106 | Germacrene B                        | sh | 1562 | -         | -        | -        | - | -        | -        | -        | -        | -         | -        | -         | -        | 22.1±2.26 |
| 107 | ( <i>E</i> )-Nerolidol              | os | 1564 | -         | -        | -        | - | -        | 0.2±0.03 | -        | 0.2±0.01 | -         | -        | 1.2±0.06  | -        | -         |
| 108 | Germacrene D-4-ol                   | os | 1576 | 29.1±0.81 | 0.5±0.06 | 3.3±0.01 | - | 0.2±0.02 | -        | -        | -        | -         | -        | 0.4±0.03  | -        | -         |
| 109 | Caryophyllene oxide                 | os | 1583 | -         | -        | -        | - | 2.8±0.15 | -        | 1.2±0.04 | 0.7±0.01 | 0.5±0.03  | -        | -         | -        | -         |
| 110 | Viridiflorol                        | os | 1591 | -         | -        | -        | - | -        | 0.1±0.06 | -        | -        | 0.4±0.02  | -        | -         | -        | -         |
| 111 | <i>iso</i> Aromadendrene epoxide    | os | 1594 | -         | -        | 0.1±0.01 | - | -        | -        | -        | -        | -         | -        | -         | -        | -         |
| 112 | Guaiol                              | os | 1597 | -         | -        | -        | - | -        | -        | -        | -        | 28.9±0.04 | -        | -         | -        | -         |
| 113 | Zingiberenol                        | os | 1616 | -         | -        | -        | - | 1.3±0.06 | -        | -        | -        | -         | -        | -         | -        | -         |
| 114 | Juneol                              | os | 1617 | -         | -        | -        | - | -        | -        | -        | 0.3±0.02 | -         | -        | -         | -        | -         |
| 115 | 1,10-Di- <i>epi</i> -Cubenol        | os | 1619 | -         | -        | -        | - | -        | -        | -        | -        | -         | -        | 3.2±0.33  | -        | -         |
| 116 | Valencene                           | sh | 1624 | -         | -        | -        | - | -        | -        | -        | -        | 0.8±0.03  | -        | -         | -        | -         |
| 117 | 10- <i>epi</i> - $\gamma$ -Eudesmol | os | 1631 | -         | -        | -        | - | -        | -        | -        | -        | 2.9±0.89  | -        | -         | -        | -         |



|     |                                                               |    |      |          |   |          |   |           |          |           |          |           |           |   |          |
|-----|---------------------------------------------------------------|----|------|----------|---|----------|---|-----------|----------|-----------|----------|-----------|-----------|---|----------|
| 128 | Selin-6-en-4alpha-ol                                          | os | 1636 | -        | - | -        | - | -         | -        | -         | 1.6±0.05 | -         | -         | - | -        |
| 119 | Hinesol                                                       | os | 1638 | -        | - | -        | - | -         | -        | -         | -        | 6.7±3.03  | -         | - | -        |
| 120 | T-cadinol                                                     | os | 1640 | -        | - | -        | - | 1.3±0.01  | -        | -         | -        | -         | 22.4±3.64 | - | -        |
| 121 | T-Muurolol                                                    | os | 1642 | 2.6±0.42 | - | 0.1±0.02 | - | -         | -        | -         | -        | -         | -         | - | -        |
| 122 | δ-Cadinol                                                     | os | 1643 | 0.2±0.12 | - | -        | - | -         | -        | -         | -        | -         | -         | - | -        |
| 123 | 1,3a-ethanol(1H)indien-4-ol,<br>otahydro-2,2,4,7a-tetramethyl | os | 1648 | -        | - | -        | - | -         | -        | -         | 0.2±0.01 | -         | -         | - | -        |
| 124 | β-Eudesmol                                                    | os | 1652 | -        | - | -        | - | -         | -        | -         | -        | 15.5±1.36 | 0.8±0.18  | - | -        |
| 125 | α-Eudesmol                                                    | os | 1652 | -        | - | -        | - | -         | -        | -         | -        | 11.8±1.64 | -         | - | -        |
| 126 | α-Cadinol                                                     | os | 1654 | 6.8±1.03 | - | 0.3±0.01 | - | -         | -        | -         | -        | -         | 1.0±0.19  | - | -        |
| 127 | Agarospirol                                                   | os | 1655 | -        | - | -        | - | -         | -        | 0.5±0.02  | -        | 1.9±0.06  | -         | - | -        |
| 128 | Bulnesol                                                      | os | 1672 | -        | - | -        | - | -         | -        | 1.2±0.09  | -        | -         | -         | - | -        |
| 129 | Aromadendrene oxide-(2)                                       | os | 1678 | -        | - | -        | - | 0.6±0.04  | -        | -         | -        | -         | -         | - | -        |
| 130 | Elemol acetate                                                | os | 1681 | -        | - | -        | - | -         | -        | 24.3±2.56 | -        | -         | -         | - | -        |
| 131 | (+)-Valeranone                                                | os | 1684 | -        | - | -        | - | -         | -        | -         | -        | 1.9±0.02  | -         | - | -        |
| 132 | α-Bisabolol                                                   | os | 1686 | -        | - | -        | - | -         | -        | -         | 0.4±0.02 | -         | 0.5±0.09  | - | 1.5±0.20 |
| 133 | ent-Germacre-4(15),5,10(14)-<br>trien-1β-ol                   | os | 1695 | -        | - | -        | - | -         | 0.3±0.05 | -         | -        | -         | -         | - | -        |
| 134 | Shybnol                                                       | os | 1701 | -        | - | -        | - | -         | -        | -         | 3.3±0.17 | -         | -         | - | -        |
| 135 | β-Sinensal                                                    | os | 1712 | -        | - | -        | - | 9.0±0.13  | -        | -         | -        | -         | -         | - | -        |
| 136 | (Z)-α-trans-Bergamotol                                        | os | 1721 | -        | - | -        | - | 14.1±0.24 | -        | -         | -        | -         | -         | - | -        |
| 137 | (Z)-Nuciferol                                                 | os | 1735 | -        | - | -        | - | 0.9±0.03  | -        | -         | -        | -         | -         | - | -        |
| 138 | (Z)-β-Curcumen-12-ol                                          | os | 1746 | -        | - | -        | - | 6.3±0.01  | -        | -         | -        | -         | -         | - | -        |
| 139 | (6R,7R)-Bisabolone                                            | os | 1747 | -        | - | -        | - | 0.4±0.02  | -        | -         | -        | -         | -         | - | -        |
| 140 | cis-Lanceol                                                   | os | 1763 | -        | - | -        | - | 4.1±0.06  | -        | -         | -        | -         | -         | - | -        |
| 141 | β-Costol                                                      | os | 1778 | -        | - | -        | - | 3.3±0.05  | -        | -         | -        | -         | -         | - | -        |
| 142 | Eugenyl isovalerate                                           | pp | 1864 | -        | - | -        | - | -         | -        | -         | -        | -         | -         | - | 0.1±0.07 |
| 143 | isoPimara-9(11),15-diene                                      | dh | 1906 | -        | - | -        | - | -         | -        | -         | 1.0±0.02 | -         | -         | - | -        |

|     |                                                            |    |      |   |          |          |   |          |          |          |          |          |          |           |          |
|-----|------------------------------------------------------------|----|------|---|----------|----------|---|----------|----------|----------|----------|----------|----------|-----------|----------|
| 144 | pentylcurcumene                                            | dh | 1910 | - | -        | -        | - | -        | -        | -        | 5.9±0.69 | -        | -        | -         | -        |
| 145 | Farnesyl acetone                                           | ac | 1920 | - | -        | -        | - | -        | -        | -        | 0.5±0.06 | -        | -        | -         | -        |
| 146 | Phytol                                                     | od | 1943 | - | 0.1±0.01 | 0.3±0.03 | - | 0.5±0.05 | 1.2±0.19 | -        | -        | -        | 0.1±0.05 | -         | 0.2±0.04 |
| 147 | Abietatriene                                               | dh | 2053 | - | -        | -        | - | -        | -        | -        | 0.3±0.06 | -        | -        | -         | -        |
| 148 | 5 $\alpha$ -Androst-16-en-3-one                            | od | 2160 | - | -        | -        | - | -        | -        | -        | 0.5±0.04 | -        | -        | -         | -        |
| 149 | Podocarpa-8,11,13-triene-7 $\beta$ ,13-diol, 14-isopropyl- | nt | 2324 | - | -        | -        | - | -        | -        | -        | 1.0±0.22 | -        | -        | -         | -        |
| 150 | Ferruginol                                                 | od | 2330 | - | -        | -        | - | -        | -        | -        | 6.7±1.34 | 0.5±0.04 | -        | -         | -        |
| 151 | Abietol                                                    | os | 2381 | - | -        | -        | - | -        | -        | -        | -        | 0.2±0.16 | -        | -         | -        |
| 152 | Tetracosane                                                | nt | 2400 | - | -        | -        | - | -        | 0.3±0.05 | 1.5±0.50 | 0.3±0.07 | 0.2±0.16 | -        | 11.5±0.54 | 0.1±0.08 |
| 153 | Pentacosane                                                | nt | 2500 | - | -        | -        | - | -        | 0.4±0.03 | -        | -        | 1.7±0.04 | -        | -         | -        |

| Mentheae Tribe                  |                         |                      |                     |                    |                      |                    |                    |                     |                       | Ocimeae Tribe          |                         |                           |
|---------------------------------|-------------------------|----------------------|---------------------|--------------------|----------------------|--------------------|--------------------|---------------------|-----------------------|------------------------|-------------------------|---------------------------|
|                                 | Subtribe Nepetinae      |                      |                     |                    |                      | Subtribe Menthinae | Subtribe Salviinae |                     |                       | Subtribe Ociminae      |                         |                           |
|                                 | <i>A. 'Arcado Pink'</i> | <i>A. aurantiaca</i> | <i>A. 'BleuBoa'</i> | <i>A. mexicana</i> | <i>N. x faasanii</i> | <i>M. didyma</i>   | <i>S. discolor</i> | <i>S. dorisiana</i> | <i>S. microphylla</i> | <i>O. b 'Cinnamon'</i> | <i>O. × citriodorum</i> | <i>O. b. 'Blue Spice'</i> |
| Monoterpene Hydrocarbons (mh)   | 0.5±0.11                | 0.7±0.13             | 8.9±0.39            | 2.0±0.25           | 1.9±0.10             | 0.3±0.10           | 0.6±0.21           | 1.3±0.82            | 1.9±0.47              | 1.6±0.78               | 2.0±0.03                | 0.5±0.22                  |
| Oxygenated Monoterpenes (om)    | 2.1±0.57                | 88.8±0.35            | 75.1±0.28           | 77.6±0.67          | 19.8±0.43            | 88.4±0.28          | 0.8±0.21           | 45.5±2.81           | 6.0±0.21              | 12.3±3.85              | 83.2±0.98               | 1.8±0.60                  |
| Sesquiterpene hydrocarbons (sh) | 58.1±1.23               | 9.6±0.59             | 9.1±0.23            | 1.4±0.21           | 29.6±0.43            | 5.2±0.46           | 64.5±0.86          | 14.4±1.10           | 14.0±0.46             | 43.6±1.15              | 3.3±0.42                | 56.0±3.32                 |
| Oxygenated Sesquiterpenes (os)  | 38.7±2.47               | 0.5±0.06             | 3.8±0.02            | -                  | 44.3±0.10            | 0.6±0.13           | 27.8±2.73          | 6.7±0.26            | 75.8±0.20             | 29.6±4.65              | -                       | 1.5±0.20                  |
| Diterpene Hydrocarbons (dh)     | -                       | -                    | -                   | -                  | -                    | -                  | -                  | 7.2±0.74            | -                     | -                      | -                       | -                         |
| Oxygenated Diterpenes (od)      | -                       | 0.1±0.01             | 0.3±0.03            | -                  | 0.5±0.05             | 1.2±0.19           | -                  | 7.2±1.81            | -                     | -                      | -                       | 0.2±0.04                  |
| Non-terpene derivatives (nt)    | -                       | 0.3±0.04             | 2.0±0.08            | 1.4±0.07           | 0.9±0.07             | 2.8±0.64           | 2.7±0.79           | 1.8±0.08            | 1.9±0.14              | 0.2±0.17               | 11.5±0.54               | 0.1±0.08                  |
| Phenylpropanoids (pp)           | -                       | -                    | -                   | -                  | -                    | -                  | -                  | -                   | -                     | 10.0±1.05              | -                       | 37.8±3.36                 |
| Apocarotenoids (ac)             | -                       | -                    | -                   | 16.6±0.49          | -                    | -                  | -                  | 0.6±0.02            | -                     | -                      | -                       | -                         |
| Total Identified                | 99.4±0.56               | 100.0±0.0            | 99.2±0.26           | 99.0±0.11          | 97.0±0.09            | 98.5±0.24          | 96.4±0.30          | 84.7±2.80           | 99.8±0.21             | 97.3±0.04              | 100.0±0.0               | 97.9±0.70                 |

<sup>1</sup>Compounds present in tables with value > 1% in at least one of studied species; <sup>2</sup>LRI: relative retention index determined on HP-5MS capillary column.
